# Supplementary material
Source: publisher site journal article supplement (http://static.cambridge.org/content/id/urn:cambridge.org:id:article:S1352465818000127/resource/name/S1352465818000127supp001.docx)
Supplement: Supplementary file 1 [file S1352465818000127supp001.docx]

Figure S1a

Matrix plot of the item information functions (IIFs) for the 7 *Safety Behavior* items. For each function, the horizontal axis indicates the distribution of the latent construct (*θj*) in scale scores (ranging from -3 to 3), and the vertical axis indicates the item information available at a specific score.

Figure S1b

Matrix plot of the item information functions (IIFs) for the 7 *Avoidance* items. For each function, the horizontal axis indicates the distribution of the latent construct (*θj*) in scale scores (ranging from -3 to 3), and the vertical axis indicates the item information available at a specific score.
